## Quality circles for quality improvement in primary health care

# 1           **Quality circles for quality improvement in primary health** 2           **care: their effectiveness, gaps of knowledge, origins and** 3           **significance – a scoping review**

4   **Corresponding author:** Adrian Rohrbasser, General Practitioner

5   Medbase; Friedtalweg 18, 9500 Wil / Switzerland; +41 79 603 65 31

6   Swiss Delegate for European Society for Quality and Safety in Family Medicine

7   MSc in Evidence Based Health Care, DPhil student in Evidence Based Health Care,

8   Department of Continuing Education University of Oxford, United Kingdom

9   [adrian.rohrbasser@kellogg.ox.ac.uk](mailto:adrian.rohrbasser@kellogg.ox.ac.uk) ; [orcid.org/0000-0001-6718-6821](https://orcid.org/0000-0001-6718-6821)

10  
11  
12   Dr Janet Harris, Reader in Knowledge Mobilisation, University of Sheffield School of Health  
13   & Related Research, Sheffield, United Kingdom; [janet.harris@sheffield.ac.uk](mailto:janet.harris@sheffield.ac.uk)

14  
15   Dr Sharon Mickan, Professor of Allied Health at the Gold Coast Health Griffith University,  
16   Australia; [s.mickan@griffith.edu.au](mailto:s.mickan@griffith.edu.au)

17  
18   Dr Geoff Wong, Clinical Research Fellow, Nuffield Department of Primary Care Health  
19   Sciences, University of Oxford, Oxford, United Kingdom; [geoffrey.wong@phc.ox.ac.uk](mailto:geoffrey.wong@phc.ox.ac.uk)

## Quality circles for quality improvement in primary health care

### 40 **Abstract**

### 41 **Background**

42 Quality circles, or similarly structured small groups in primary health care, such as peer review  
43 groups, consist of 6 to 12 professionals from the same background who meet regularly to improve  
44 their standard practice. This paper reports the results from a scoping search performed to clarify  
45 possible effectiveness, knowledge gaps, underlying concepts and significance.

### 46 **Objectives**

47 To gain insight into knowledge gaps and understanding of the effectiveness, origins and significance  
48 of quality circles.

### 49 **Methods**

50 A search strategy was developed starting with 'quality circle' in PubMed and the index terms from  
51 those articles revealed were then used as search terms to identify further papers. Repeating this process  
52 in collaboration with a librarian, search strings relating to quality circles were built, and databases  
53 searched up to December 2017. Any paper on structured quality circles or related small group work in  
54 primary health care was included when relevant to the objectives.

### 55 **Results**

56 From 11973 citations, 82 background papers and 58 key papers were identified, in addition to 12  
57 books and 10 websites. 19 studies, one paper summarizing three studies and one systematic review  
58 suggest that quality circles can be effective in behaviour change, though with varying effect sizes.  
59 Quality circles and their techniques are complex, as they are not standardized, and changes seem to  
60 depend on the topic and context, which requires further research into how and why they work in order  
61 to improve them. From their origins in industry, they are now used in primary health care in many  
62 countries for continuous medical education, continuous professional development and quality  
63 improvement.

### 64 **Conclusion**

65 The evidence on quality circles indicates that they can successfully change general practitioner  
66 behaviour. As they are a complex intervention, theory-driven research approaches are needed to

## Quality circles for quality improvement in primary health care

67 understand and improve their effectiveness. This is of major importance because they play an  
68 important role in quality improvement in primary health care in many countries.

### 69 **Background**

70 Quality circles (QCs), also known as peer review groups, and other structured small groups that exist  
71 across Europe, are small groups of health care professionals who meet to reflect and improve their  
72 standard practice. They use various didactic methods, such as brain-storming and reflective thinking,  
73 and tools for quality improvement (QI), such as audit and feedback or purposeful use of local experts.  
74 They are used for quality initiatives in primary health care (PHC) in several European countries (1-  
75 10). Scotland and Wales recently introduced structured small groups for QI to replace a pre-existing  
76 outcomes-driven incentive scheme (11, 12). It is increasingly being recognized that what is missing  
77 from the literature is an account of effectiveness; namely, whether participants change their behaviour  
78 or not.

79 There are systematic reviews (SRs) on the tools used in these groups but there is still doubt as  
80 to whether they make participants improve their practice, even if the tools are used in combination.  
81 This paper reports the results of a scoping review to map areas of uncertainty regarding QC  
82 effectiveness, thereby indicating where further research is needed. It maps size and type of evidence  
83 and describes original intentions and reported benefits. To gain additional insight into the potential and  
84 significance in different countries, the historical development and drivers of QCs are also reported.  
85 The objectives of the scoping review involved several steps and followed the guidelines for  
86 conducting systematic scoping reviews (13):

- 87 • mapping the size and type of evidence of the existing literature
- 88 • describing and defining QCs
- 89 • establishing their effectiveness
- 90 • recognizing gaps in knowledge
- 91 • describing their intentions and reported benefits
- 92 • describing their historical development and significance

93

## Quality circles for quality improvement in primary health care

94 This paper provides a working definition of QCs and describes their basic properties, effectiveness,  
95 knowledge gaps, historical background and significance. The implications of possible knowledge gaps  
96 are also discussed.

### 97 **Methods**

#### 98 *Information Sources and Search*

99 Background information, such as basic QC characteristics, reports on their historical development and  
100 their spread from industry to the health care sector, was retrieved from 12 relevant textbooks identified  
101 by AR, a content expert in the field of QI and associated small group work (14-25).

102 The literature search, including literature up to December 2017, was performed in several  
103 steps by AR. Initially, a limited search was performed in PubMed using the term ‘quality circle’ to  
104 identify some papers to be used as a starting point. In collaboration with an experienced librarian,  
105 analysis of text words in the title, abstract and indexing helped identify additional search terms.  
106 Iterative searching yielded search strings relating to descriptors of QCs, such as ‘quality  
107 improvement’, ‘group functions’ or ‘primary care’ (supplementary file S1). Literature was retrieved in  
108 Medline, Embase, PsycInfo and CINAHL without language or time restrictions and downloaded to  
109 Endnote, a standard software tool for publishing and managing bibliographies, citations and  
110 references.

#### 111 *Eligibility Criteria*

112 Any paper on QCs within PHC, with qualitative or quantitative outcomes, or background information,  
113 was considered for inclusion. AR screened all papers found during the search process, whilst SM, JH  
114 and GW cross-checked them for consistency in the application of the eligibility criteria.

#### 115 *Paper Selection*

116 The quality of data retrieved was only assessed as to whether it provided relevant information about  
117 QCs in PHC (26). AR made the relevance assessments, which were then explored in discussions with  
118 SM, JH and GW. The following questions were used to assess relevance:

## Quality circles for quality improvement in primary health care

- 119 • Does the paper cover the background of QCs in PHC?
- 120 • Does the paper describe the process in these small groups?
- 121 • Do the papers provide enough data to allow evaluation?

122

123 The number of papers excluded and included at each stage is indicated in the flow diagram (Figure 1).

124 Figure 1: paper flow diagram

### 125 ***Data Collection and Reporting***

126 The following types of data were extracted from the documents by AR: authors, year of publication,  
127 location, and data describing background, definitions of QCs, their underlying processes and possible  
128 effectiveness, historical development and significance in PHC today. The data were then put into a  
129 narrative and tables to describe the different aspects of QCs. A data collection template was not used  
130 as it was difficult to anticipate how the data would be presented. Data were charted to answer the  
131 review objectives.

### 132 **Results**

133 12 text books were identified, and iterative searches returned 82 background papers and 58 key papers  
134 which were deemed eligible and relevant (supplementary files S2, S3 and S4). Additionally, 10  
135 informative websites of various organisations were identified (1-10) as well as 8 papers, after a  
136 specific search concerning the research methods of complex interventions, such as small group  
137 interventions (27-34). Key papers mainly described or evaluated processes of QCs using research  
138 methods, such as systematic reviews (SR), randomised controlled trials (RCT), cohort, or before and  
139 after studies. Qualitative studies provided further information on their process and additional benefits.  
140 Background papers and the aforementioned websites provided data in reports and summaries on the  
141 history, development and significance of QCs.

### 142 ***What QCs are***

143 Within those documents included, the authors identified concurrent key concepts relating to QCs and  
144 then agreed on a definition: QCs comprise small groups of 6 to 12 professionals from the same

## Quality circles for quality improvement in primary health care

145 background who meet regularly to reflect on and improve their standard practice (1, 4-6, 8-10, 14, 16-  
146 23, 25, 35-46) . The terms Practice Based Small Group Work, Peer Review Group, Problem Based  
147 Small Group Learning, Practice Based Research Group, Quality Circle, Continuous Medical  
148 Education (CME) Group, and Continuous Professional Development (CPD) Group are used  
149 interchangeably in different countries. The labelling suggests the basic, original intention of the group,  
150 although they may now serve the same purpose. In this scoping review, the term Quality Circle is used  
151 as an umbrella term to include all of them.

152         The groups choose a topic they want to learn more about or a quality aspect which they want  
153 to improve in their practice. They decide on how to approach and solve the issue, and they create  
154 space for reflective thinking to improve clinical practice (1, 5, 15, 22, 45, 47-55).

155         The groups also choose their own facilitators, who observe and lead the group through the  
156 cycle of QI. Whilst respecting the contribution of each individual, and taking into consideration group  
157 dynamics, facilitators try to keep the members focused on the issue without controlling them (19, 22,  
158 56-61).

159         QC techniques usually comprise a combination of different types of tools, such as the use of  
160 educational material discussed in a workshop-like atmosphere, contact with local knowledge experts,  
161 audit and feedback on clinical practice with or without outreach visits, facilitation and local consensus  
162 processes (36, 37, 42, 43, 46, 54, 55, 62-67). The group may also rehearse clinical skills and use active  
163 didactic methods to promote learning, such as brain-storming, reflective thinking, self-monitoring and  
164 professional reprocessing of patient situations (1, 7, 8, 10, 18, 23, 25, 68).

165         The varying tools and didactic methods are usually tailored to the locally prevailing  
166 circumstances (30, 54, 68, 69). The number and difficulty of these tools and didactic methods, as well  
167 as outcomes and the context of the group, affect the process. Therefore, QCs are complex social  
168 interventions (28, 31, 70) that are run in PHC systems and which change constantly with the prevailing  
169 economic situation, scientific development and cultural circumstances (27, 30). They incorporate  
170 social aspects of the workplace that affect team work, self-determination and involvement in  
171 management at a day-to-day level.

## Quality circles for quality improvement in primary health care

### 172 **Effectiveness**

173 24 quantitative studies and 1 SR were assessed as to whether QCs promote behaviour change. 19

174 studies, one paper summarizing three studies and one SR from the scoping review suggest that QCs

175 improve individual and group performance in terms of costs, ordering of tests, prescription habits or

176 adherence to clinical practice guidelines (Table 1).

177 Table 1: Effectiveness of quality circles

| First author / year         | Study type            | Intervention                                                        | Effect |
|-----------------------------|-----------------------|---------------------------------------------------------------------|--------|
|                             |                       | <b><i>Guideline adherence improved</i></b>                          |        |
| <i>Hartmann 1995 (71)</i>   | Before and after      | Diabetes type 2                                                     | (Yes)  |
| <i>Ioannidis 2007 (40)</i>  | Before and after      | Osteoporosis, pilot                                                 | (Yes)  |
| <i>Ioannidis 2009 (72)</i>  | Before and after      | Osteoporosis                                                        | Yes    |
| <i>Mahlknecht 2016 (45)</i> | Before and after      | Chronic diseases                                                    | (Yes)  |
| <i>Elward 2014 (73)</i>     | Cohort                | Asthma                                                              | Yes    |
| <i>Goldberg 1998 (74)</i>   | Randomised controlled | Hypertension and depression                                         | No     |
| <i>Lagerlov 2000 (75)</i>   | Randomised controlled | Asthma and urinary tract infections                                 | Yes    |
| <i>Schneider 2008 (76)</i>  | Randomised controlled | Asthma                                                              | No     |
| <i>Wilcock 2013 (51)</i>    | Randomised controlled | Dementia                                                            | No     |
| <i>Jager 2017 (77)</i>      | Randomised controlled | Polypharmacy                                                        | No     |
|                             |                       | <b><i>Prescription quality improved</i></b>                         |        |
| <i>Dyrkorn 2016 (78)</i>    | Cohort                | for antibiotics                                                     | Yes    |
| <i>Welschen 2004 (79)</i>   | Randomised controlled | for antibiotics                                                     | Yes    |
| <i>Gjelstad 2013 (80)</i>   | Randomised controlled | for antibiotics                                                     | Yes    |
| <i>Vervloet 2016 (81)</i>   | Randomised controlled | for antibiotics                                                     | Yes    |
| <i>Rognstad 2013(82)</i>    | Randomised controlled | in general, for elderly                                             | Yes    |
| <i>Richards 2003(83)</i>    | Cohort                | in general                                                          | Yes    |
|                             |                       | <b><i>Prescription quality improved and/or costs decreased</i></b>  |        |
| <i>Wensing 2004(84)</i>     | Cohort                | prescription quality and costs                                      | Yes    |
| <i>Wensing 2009 (85)</i>    | Cohort                | prescription quality and costs                                      | Yes    |
| <i>Niquille 2010 (86)</i>   | Cohort                | prescription quality and costs                                      | Yes    |
| <i>Riou 2007 (41)</i>       | Cohort                | prescription costs                                                  | Yes    |
|                             |                       | <b><i>Test ordering quality improved and/or costs decreased</i></b> |        |
| <i>Verstappen 2003 (87)</i> | Randomised controlled | test ordering quality                                               | Yes    |

## Quality circles for quality improvement in primary health care

|                             |                       |                                          |     |
|-----------------------------|-----------------------|------------------------------------------|-----|
| <i>Verstappen 2004 (88)</i> | Randomised controlled | test ordering quality                    | Yes |
| <i>Verstappen 2004 (89)</i> | Randomised controlled | test ordering quality and cost reduction | Yes |
|                             |                       | <b><i>Patient safety improved</i></b>    |     |
| <i>Verbakel 2015 (90)</i>   | Randomised controlled | reporting of critical incidents          | Yes |
| <i>Zaher 2012 (91)</i>      | Systematic review     | Behaviour change                         | Yes |

178 Legend:

179 ( ) means that authors report limited validity of the results

180

181

182 20 SRs of high quality and one RCT show that many tools used by QCs predispose

183 professionals to provide care in a different way, enable them to introduce the change, and reinforce it

184 once it has been made (92) (Table 2).

185 Table 2: Systematic reviews and randomised controlled trials on tools used in quality circles

| <u>First author / year</u>                      | <u>Tool</u>                                                  | <u>Study type</u> | <u>Effect</u> |
|-------------------------------------------------|--------------------------------------------------------------|-------------------|---------------|
| <b><u>Predisposing</u></b>                      |                                                              |                   |               |
| <i>Davis 1999 (93)</i>                          | Interactive CME meetings                                     | SR                | +             |
| <i>Davis 2006(94)</i>                           | Self-assessment                                              | SR                | -             |
| <i>O'Brien 2007(95)</i>                         | Educational outreach visits                                  | SR                | +             |
| <i>Bowie 2008(96)</i>                           | Significant event analysis                                   | SR                | + / -         |
| <i>O'Brian 2001, Forsetlund 2009(97, 98)</i>    | Educational meetings and workshops                           | SR                | +             |
| <i>Harris 2011(99)</i>                          | Journal club                                                 | SR                | + / -         |
| <i>Flodgren 2011(100)</i>                       | Local opinion leaders                                        | SR                | +             |
| <i>Farmer 2008, Giguere 2012(101, 102)</i>      | Printed educational materials                                | SR                | + / -         |
| <b><u>Enabling</u></b>                          |                                                              |                   |               |
| <i>Grimshaw 2012(103)</i>                       | Clinical guidelines                                          | SR                | + / -         |
| <i>Dogherty 2010, Baskerville 2012 (58, 59)</i> | Facilitation                                                 | SR                | ++            |
| <i>Baker 2010, Baker 2015 (104, 105)</i>        | Tailored interventions                                       | SR                | +             |
| <i>Parmelli 2011 (106)</i>                      | Change of organisational culture                             | SR                | +/-           |
| <b><u>Reinforcing</u></b>                       |                                                              |                   |               |
| <i>Gill 1999 (107)</i>                          | Multifaceted interventions to improve prescribing            | SR                | +             |
| <i>Arnold 2005 (108)</i>                        | Multifaceted interventions to improve antibiotic prescribing | SR                | +             |
| <i>Roberts 2012 (109)</i>                       | Peer review                                                  | RCT               | +             |
| <i>Ivers 2012 (110)</i>                         | Audit and feedback                                           | SR                | ++            |
| <i>Cadogan 2015 (111)</i>                       | Multifaceted interventions to improve test ordering          | SR                | +             |

186

187 Legend

188 + / - no conclusive evidence

189 + small effect

190 ++ significant effect



## Quality circles for quality improvement in primary health care

### 191 ***Knowledge gaps***

192 All authors of SRs showing effect on behaviour change noted considerable variations within and  
193 between studies without being able to account for them. It is difficult to explain in SRs why behaviour  
194 change happens in QCs (93). A detailed description of the process of intervention of each step is  
195 needed to evaluate how and why they may or may not work (95, 98, 100, 103). This is not only  
196 necessary for understanding each step but also for understanding combinations of different  
197 interventions or steps, such as the use of printed educational material, combined with the use of local  
198 opinion leaders, CME workshop and/or outreach visits (101, 103). It is not known which methods  
199 should be used, and under what circumstances, to enable QCs to address the reasons for resisting new  
200 practices and barriers to them (105). For example, audit and feedback interventions have typically  
201 produced heterogeneous effects, and therefore more exploration is needed to determine the underlying  
202 reasons for behaviour change, how best to design and deliver this intervention, when and how to use  
203 audit and feedback and, finally, how to optimise this in routine practice (110).

204 As small group work succeeds in CME, the question arises as to how and why this may or  
205 may not work for quality projects as well (54). It seems essential to examine what resources small  
206 groups offer GPs for changing behaviour (72). In other words, what it is about QCs that influences the  
207 clinical performance of GPs. Further studies are needed to find out how they can be tailored to GPs to  
208 achieve better results and what group factors are crucial for better outcomes (85). More information is  
209 required to determine how often the group process should be repeated, accepting the fact that once  
210 may not be enough (51, 90, 110). As there are hardly any theory-based interventions about change in  
211 clinical practice, further research should concentrate on improving our understanding of when, how  
212 and why interventions, such as education or providing guidelines, are likely to be effective and how to  
213 improve them (111).

### 214 ***Intentions and benefits of QCs***

215 Knowledge and skills acquired during initial medical education need to be updated through CME,  
216 which aims to promote the application of new knowledge via CPD (93, 98, 112, 113). CME and CPD  
217 are necessary prerequisites for QI (114-117).

## Quality circles for quality improvement in primary health care

218 QI is a data-guided activity that brings about positive change in the delivery of care. It deals  
219 with local problems like perceived inefficient, harmful or badly-timed health care (118, 119). In  
220 some European countries, QCs seem to play a major role in QI, whereas in others they mainly serve  
221 CME and CPD (39).

222 According to qualitative literature, QCs have a number of benefits. Small group work seems to  
223 be the preferred way of learning for GPs (47, 53, 116, 120, 121). The groups help them to link  
224 evidence to everyday practice (57), learn how to deal with uncertainty (122) and how to improve  
225 practice (54). They are a vehicle for discussing issues and reflecting on practice, that may increase  
226 self-esteem (123, 124). Frequent participation strengthens team-based strategies for error prevention  
227 (125). Participation in groups can mean someone stepping out of their comfort zone when talking  
228 about their own practice performance. This may raise anxiety and generate a stress response (124,  
229 126). This same response, however, seems to improve communication skills and provides an  
230 opportunity for learning (61, 127). Several groups of authors note that small groups may be an  
231 important factor in preventing burnout and for someone remaining in the same area (50, 61, 91, 128-  
232 130).

### 233 *Origins and Significance of QCs*

234 There are two fundamental concepts that have underpinned the basic understanding of QCs from the  
235 beginning of their development: the framework of the Plan-Do-Check-Act Cycle (PDCA) and the  
236 social context the group provides for its function (131). In 1924, Shewart created the first table  
237 depicting a cycle for continuous control of the QI process (Figure 2) (132). The PDCA cycle is based  
238 on the idea that front-line workers often recognize ways of improving production, and will experience  
239 increased motivation when given opportunities to participate actively in making those improvements  
240 (14, 133). The principles of QI were adopted in health care and presented in three interdependent  
241 quality dimensions that interrelate and influence each other: structure, process and outcome. (134).  
242 Ethical aspects of quality became essential with increasingly discerning patients and public health  
243 interests(135) This model of QI in health care was first implemented in in-patient settings and  
244 secondary-care clinics in the Netherlands. Development drivers for QCs were the participative group

## Quality circles for quality improvement in primary health care

245 problem-solving approach and the need for shared responsibility for decision-making in fast growing  
246 and costly health care systems (136). Ethical aspects of quality became essential with increasingly  
247 discerning patients and public health interests

248 Figure 2: Development of QI Process

249 QCs in *PHC* originated in two centres: McMaster University in Canada, and the University of  
250 Nijmegen in the Netherlands. Both promoted Problem Based Learning (PBL) where a group of  
251 learners are confronted with a problem they have to solve, making them participate actively in gaining  
252 knowledge about a particular issue (137).

253 At McMaster, a practical method using PBL was presented in 1974, whereby GPs met on a  
254 regular basis to exchange thoughts about clinical cases and increase and update their knowledge (138).  
255 As these groups were primarily concerned with lifelong learning needs, the technique was called  
256 Problem Based Small Group Learning (PBSGL) or CME groups.

257 In 1979, PBL was also implemented experimentally with small groups of GPs in Nijmegen,  
258 who met voluntarily on a regular basis, using their peers to continuously and autonomously improve  
259 their knowledge (39). As the Netherlands had adopted Donabedian's dimensions of quality in health  
260 care, their small group work contained features of QI. Gradually, the learning cycle transformed into a  
261 cycle of QI, as the focus changed from knowledge gain to using knowledge to improve practice (139,  
262 140). PBL added didactic techniques and industrial small group work added communication skills and  
263 knowledge about group dynamics.

264 In subsequent years, the PBSGL method spread from McMaster, Canada, to Ireland, Scotland  
265 and England through the building of networks by teachers, academics and policy makers (2, 6-8, 141).  
266 Likewise, the European Society for Quality and Safety in Family Medicine (EQuIP) was founded and  
267 served as a communication channel for sharing developments, such as QCs, which spread rapidly  
268 from the Netherlands to many other European countries, as well as to the USA, Australia and New  
269 Zealand, as shown in Figure 3 (1-10, 39, 74, 83, 122, 124, 142-147) . In 2015, EQuIP organised a  
270 conference in Fischingen, Switzerland, on QCs in PHC where representatives of these very similar  
271 movements documented the range of components, characterised their underlying mechanisms and the  
272 local context in which they are conducted.

## Quality circles for quality improvement in primary health care

273 Figure 3: Spread of QCs

### 274 **Discussion**

#### 275 *Summary*

276 QCs can change GP behaviour to varying extents and, within the existing SRs and RCTs, authors note  
277 small but significant changes in behaviour. Group work appears to fit GP expectations when it comes  
278 to CME, CPD and QI projects, where they play a significant role. QCs developed rapidly as the  
279 participative group-problem solving approach and the need for shared responsibility became important  
280 in societies with spiralling costs for health care.

#### 281 *Knowledge Gap*

282 The evidence on QCs indicates the existence of substantial knowledge gaps. For example, in studies  
283 using methods such as RCT or cohort studies on QCs, or elements thereof, only small and  
284 heterogenous effect sizes were noted and it was unclear why these occurred. Further, SRs and RCTs  
285 on tools used in QCs have only examined their individual impact or effectiveness. When some have  
286 been used in combination, their relative contribution to the overall effect is unclear (107, 108, 111).  
287 Finally, it is not known in what way and how many times the process of improvement should be  
288 repeated to increase effect sizes(51, 90, 110).

289 Since QCs embody a complex intervention that is not standardized, and which changes  
290 continuously depending on the topic and the context of the group, these results and comments are not  
291 surprising (148). Questions regarding the effectiveness of different variations of QC techniques  
292 remain unanswered, as well as questions regarding the conditions under which they are most likely to  
293 succeed or fail.

#### 294 *Future Research Directions*

295 Complex interventions such as QCs are difficult to examine. One way of doing this is through the use  
296 of realist approaches, namely realist review and realist evaluation. These are theory driven approaches  
297 that allow questions to be answered about what works; for whom, how, and why – or not, and in what

## Quality circles for quality improvement in primary health care

298 contexts (148, 149). We have built on the findings of this scoping review and are undertaking a realist  
299 review to address these knowledge gaps and research needs (150).

### 300 ***Strengths and Limitations***

301 To our knowledge, this is the first summary on the origin, significance and effectiveness of QCs in  
302 PHC. This review followed accepted methods for undertaking a scoping review and was done in a  
303 systematic manner with inbuilt quality assurance processes. Through multiple searches with the input  
304 of an expert librarian, we identified a sufficient range of relevant documents that enabled us to fulfil  
305 the objectives of the review. Our review is not and was never intended to be a comprehensive  
306 summary of evidence regarding QCs. It was designed to clarify working definitions, characteristics  
307 and knowledge gaps with a view to planning further research.

### 308 **Conclusion**

309 QCs play a major role in CME/CPD and QI. Current evidence indicates that they can be successful  
310 but effect size varies substantially. As they are sensitive to local conditions, future research is needed  
311 to understand what ingredients and what contextual features lead to successful QCs, using appropriate  
312 research techniques such as a realist approach.

### 313 **Acknowledgement**

314 Nia Roberts, at the Department of Primary Health Care Sciences, Bodleian Libraries, University of  
315 Oxford, has contributed substantially to the search strategy of this work.

316

### 317 **References**

- 318 1. Diel F. Qualitätszirkel 2013 [German Definition of Structured Small Group Work].  
319 Available from: <http://www.kbv.de/html/qualitaetszirkel.php>.  
320 2. Garbutt D, Dunion L, Walker S, Ford L, Steele D, Tannahill A, et al. Welcome to the  
321 Practice Based Small Group Learning (PBSGL) Glasgow: National Health Service Scotland;  
322 2015 [cited 2015 10/09]. PBSGL Home Page]. Available from:  
323 [http://www.nes.scot.nhs.uk/education-and-training/by-theme-initiative/patient-safety-and-](http://www.nes.scot.nhs.uk/education-and-training/by-theme-initiative/patient-safety-and-clinical-skills/safe-results/practice-based-small-group-learning-(pbsgl).aspx)  
324 [clinical-skills/safe-results/practice-based-small-group-learning-\(pbsgl\).aspx](http://www.nes.scot.nhs.uk/education-and-training/by-theme-initiative/patient-safety-and-clinical-skills/safe-results/practice-based-small-group-learning-(pbsgl).aspx).

## Quality circles for quality improvement in primary health care

- 325 3. Kirk UB. European Society of Quality and Safety in Primary Health Care (EQuiP): a  
326 network organisation within WONCA Region Europe 2015 [Available from:  
327 <http://equip.woncaeurope.org/>.  
328 4. Arvidsson GA, Elmroth U. PrimärvårdsKvalitet - lanseringen fortsätter! [Quality in  
329 primary health care - the launch continues]. Allmän Medicin [Internet]. 2016 25/10/2016  
330 [cited 2016 10/8]; 2. Available from: [http://sfam.se/artiklar/primarvardskvalitet-lanseringen-](http://sfam.se/artiklar/primarvardskvalitet-lanseringen-fortsatter)  
331 [fortsatter](http://sfam.se/artiklar/primarvardskvalitet-lanseringen-fortsatter).  
332 5. Hockl W. Qualitätszirkel 2016 [Austrian Definition of Structured Small Group Work].  
333 Available from: <https://oegam.at/qualitaetssicherung-und-qualitaetszirkel>.  
334 6. Finnegan H. CME Small Group Meetings Dublin: Irish College of General  
335 Practitioners (ICPC); 2017 [Irish Structured Small Group Work]. Available from:  
336 [https://www.icgp.ie/go/courses/cme\\_small\\_group\\_meetings](https://www.icgp.ie/go/courses/cme_small_group_meetings).  
337 7. Elmslie T, Armson H, McLeod E, Bordma R, Shaw E, Teeple L, et al. Practice Based  
338 Small Group Learning (PBSGL) Hamilton: McMaster; 2017 [Canadian Structured Small  
339 Group Work]. Available from: <https://www.fmpe.org/>.  
340 8. Rial J. Practice Based Small Group Learning (PBSGL) Southampton2017 [English  
341 Structured Small Group Work]. Available from: <https://www.pbssl.co.uk/>.  
342 9. Dressarts T, Martin C. Les Groups de Pairs Paris: SGMF; 2017 [French Structured  
343 Small Group Work]. Available from: [http://www.sfm.org/groupe\\_de\\_pairs/](http://www.sfm.org/groupe_de_pairs/).  
344 10. Rohrbasser A. Qualitätszirkel Bern: SSIM; 2017 [Swiss Definition of Structured  
345 Small Group Work]. Available from: <http://www.sgaim.ch/de/qualitaet/qualitaetszirkel.html>.  
346 11. Smith GI, Mercer SW, Gillies JC, McDevitt A. Improving together: a new quality  
347 framework for GP clusters in Scotland. British Journal of General Practice.  
348 2017;67(660):294-5.  
349 12. Rohrbasser A, Guthrie B, Gillies G, Mercer S. Collaborative Quality Improvement in  
350 General Practice Clusters. Report. Glasgow: Scottish School of Primary Care; 2017  
351 03/08/2017. Contract No.: 12.  
352 13. Peters MDJ, Godfrey CM, Khalil H, McInerney P, Parker D, Soares CB. Guidance for  
353 conducting systematic scoping reviews. International Journal of Evidence-Based Healthcare.  
354 2015;13(3):141-6.  
355 14. Ross JE, Ross WC. Japanese quality circles and productivity Reston, Va. : Reston  
356 Pub. Co; 1982.  
357 15. Ishikawa K. How to Operate Quality Circle Activities. Tokyo: QC Headquarters,  
358 Union of Japanese Scientists and Engineers; 1985.  
359 16. Lawrence M, Schofield T. Medical Audit in Primary Health Care. Press OU, editor:  
360 Oxford University Press; 1993.  
361 17. Gerlach FM, Bahrs O. Qualitätssicherung durch hausärztliche Qualitätszirkel:  
362 Strategien zur Etablierung. Bibliothek DD, editor. Berlin: Ullstein Mosby; 1994.  
363 18. Bahrs O, Gerlach FM, Szecsenyi J, editors. Ärztliche Qualitätszirkel: Leitfaden für  
364 den niedergelassenen Arzt. 2 ed. Köln: Deutscher Ärzteverlag; 1995.  
365 19. Grol R, Lawrence M, editors. Quality Improvement by Peer Review. Oxford: Oxford  
366 University Press; 1995.  
367 20. Marinker M, editor. Medical Audit and General Practice Second edition ed. London:  
368 BMJ Publishing Group; 1995.  
369 21. Fraser R, Mayur L, Baker R. Evidence-Based Audit in General Practice Science E,  
370 editor: Butterworth Heinemann; 1999.  
371 22. Tross O. Qualitätszirkel als Form der Arbeitsorganisation: Planung und Gestaltung  
372 von Qualitätszirkeln als Variante der Teamarbeit in Unternehmen. GRIN, editor. München:  
373 Verlag für Akademische Texte; 2003.

## Quality circles for quality improvement in primary health care

- 374 23. Elwyn G, Greenhalg T, Macfarlane F. Groups. A guide to small group work in  
375 healthcare, management, education and research: Radcliffe Medical Press; 2004.
- 376 24. Saltman R, Bankauskaite V, Vrangbaek K. Primary care in the driver's seat?:  
377 Organizational reform in European primary care: McGraw-Hill Education (UK); 2005.
- 378 25. Sommers LS, Launer J, editors. Clinical uncertainty in primary care: the challenge of  
379 collaborative engagement. London: Springer; 2013.
- 380 26. Armstrong R, Hall BJ, Doyle J, Waters E. 'Scoping the scope' of a cochrane review.  
381 Journal of Public Health. 2011;33(1):147-50.
- 382 27. Plsek PE, Greenhalgh T. The challenge of complexity in health care. BMJ : British  
383 Medical Journal. 2001;323(7313):625-8.
- 384 28. Mennin S. Small-group problem-based learning as a complex adaptive system.  
385 Teaching and Teacher Education. 2007;23(3):303-13.
- 386 29. Craig P, Dieppe P, Macintyre S, Michie S, Nazareth I, Petticrew M. Developing and  
387 evaluating complex interventions: the new Medical Research Council guidance. BMJ.  
388 2008;337.
- 389 30. Shiell A, Hawe P, Gold L. Complex interventions or complex systems? Implications  
390 for health economic evaluation. BMJ. 2008;336(7656):1281-3.
- 391 31. Egan M, Bambra C, Petticrew M, Whitehead M. Reviewing evidence on complex  
392 social interventions: appraising implementation in systematic reviews of the health effects of  
393 organisational-level workplace interventions. Journal of Epidemiology and Community  
394 Health. 2009;63(1):4-11.
- 395 32. Craig P, Dieppe P, Macintyre S, Michie S, Nazareth I, Petticrew M. Developing and  
396 evaluating complex interventions: The new Medical Research Council guidance. International  
397 Journal of Nursing Studies. 2013;50(5):587-92.
- 398 33. Moore GF, Audrey S, Barker M, Bond L, Bonell C, Hardeman W, et al. Process  
399 evaluation of complex interventions: Medical Research Council guidance. BMJ : British  
400 Medical Journal. 2015;350.
- 401 34. Fletcher A, Jamal F, Moore G, Evans RE, Murphy S, Bonell C. Realist complex  
402 intervention science: Applying realist principles across all phases of the Medical Research  
403 Council framework for developing and evaluating complex interventions. Evaluation.  
404 2016;22(3):286-303.
- 405 35. Schillemans L, Grande LD, Remmen R. Using quality circles to evaluate the efficacy  
406 of primary health care. New Directions for Program Evaluation. 1989;1989(42):19-27.
- 407 36. Gerlach FM, Beyer M, Romer A. Quality circles in ambulatory care: state of  
408 development and future perspective in Germany. Int J Qual Health Care. 1998;10(1):35-42.
- 409 37. Ennis K, Harrington D. Quality management in Irish health care. Int J Health Care  
410 Qual Assur Inc Leadersh Health Serv. 1999;12(6-7):232-43.
- 411 38. Forster DH, Krause G, Gastmeier P, Ebner W, Rath A, Wischniewski N, et al. Can  
412 quality circles improve hospital-acquired infection control? J Hosp Infect. 2000;45(4):302-10.
- 413 39. Beyer M, Gerlach FM, Flies U, Grol R, Krol Z, Munck A, et al. The development of  
414 quality circles/peer review groups as a method of quality improvement in Europe. Results of a  
415 survey in 26 European countries. Fam Pract. 2003;20(4):443-51.
- 416 40. Ioannidis G, Papaioannou A, Thabane L, Gafni A, Hodsman A, Kvern B, et al.  
417 Canadian Quality Circle pilot project in osteoporosis: rationale, methods, and feasibility. Can  
418 Fam Physician. 2007;53(10):1694-700.
- 419 41. Riou F, Piette C, Durand G, Chaperon J. Results of a 12-month quality-circle  
420 prescribing improvement programme for GPs. Br J Gen Pract. 2007;57(540):574-6.
- 421 42. Overton GK, McCalister P, Kelly D, MacVicar R. The Practice-based Small Group  
422 Learning programme: experiences of learners in multi-professional groups. J Interprof Care.  
423 2009;23(3):262-72.

## Quality circles for quality improvement in primary health care

- 424 43. Chop I, Eberlein-Gonska M. Übersichtsartikel zum Peer Review Verfahren und seine  
425 Einordnung in der Medizin [Overview on peer review techniques]. Zeitschrift für Evidenz,  
426 Fortbildung und Qualität im Gesundheitswesen. 2012;106(8):547-52.
- 427 44. Armson H, Elmslie T, Roder S, Wakefield J. Encouraging Reflection and Change in  
428 Clinical Practice: Evolution of a Tool. Journal of Continuing Education in the Health  
429 Professions. 2015;35(3):220-31.
- 430 45. Mahlnecht A, Abuzahra ME, Piccoliori G, Enthaler N, Engl A, Sonnichsen A.  
431 Improving quality of care in general practices by self-audit, benchmarking and quality circles.  
432 Wiener klinische Wochenschrift. 2016;128(19-20):706-18.
- 433 46. Fuchs S, Parthier K, Wienke A, Mau W, Klement A. Fostering needs assessment and  
434 access to medical rehabilitation for patients with chronic disease and endangered work ability:  
435 Protocol of a multilevel evaluation on the effectiveness and efficacy of a CME intervention  
436 for general practitioners. Journal of Occupational Medicine and Toxicology. 2017;12 (1) (no  
437 pagination)(21).
- 438 47. Lesmes-Anel J, Robinson G, Moody S. Learning preferences and learning styles: a  
439 study of Wessex general practice registrars. British Journal of General Practice.  
440 2001;51(468):559-64.
- 441 48. Dahinden A, Rohrbasser A, Ryser O, Zoller M. Definition medizinischer  
442 Qualitätszirkel – ein Vernehmlassungstext Eine Neuorientierung der Empfehlungen für die  
443 medizinische Qualitätsarbeit in der Schweiz [Definition of structured small group work -  
444 acknowledged recommendations for quality improvement in Switzerland]. Primary Care.  
445 2005;5(16):370-2.
- 446 49. Jensen PM, Trollope-Kumar K, Waters H, Everson J. Building physician resilience.  
447 Can Fam Physician. 2008;54(5):722-9.
- 448 50. Jenson CM, Hutchins AJ, Rowlands G. Is small-group education the key to retention  
449 of sessional GPs? Education for Primary Care. 2006;17(3):218-26.
- 450 51. Wilcock J, Iliffe S, Griffin M, Jain P, Thune-Boyle I, Lefford F, et al. Tailored  
451 educational intervention for primary care to improve the management of dementia: The  
452 EVIDEM-ED cluster randomized controlled trial. Trials. 2013;14 (1) (no pagination)(397).
- 453 52. Zwald E. Die ARGOMED-Qualitätszirkel 2013 [Definition of Quality Circle in  
454 Networks]. Available from: <http://www.argomed.ch/qualitaetszirkel.html>.
- 455 53. Francois P, Philibert AC, Esturillo G, Sellier E. [Peer groups: a model for the  
456 continuous professional development in general practice]. Presse Medicale. 2013;42(1):e21-7.
- 457 54. Fisher DM, Brenner CJ, Cheren M, Stange KC. Engagement of groups in family  
458 medicine board maintenance of certification. Journal of the American Board of Family  
459 Medicine: JABFM. 2013;26(2):149-58.
- 460 55. Shears MR. Peer group learning in the context of an innovative postgraduate  
461 certificate for GP trainers: enhancing collaborative learning. Education for Primary Care.  
462 2013;24(6):404-9.
- 463 56. Weiss-Plumeyer m. Was sollte ein Moderator machen. In: Bahrs O, Gerlach FM,  
464 Szecsenyi J, editors. Ärztliche Qualitätszirkel. 2 ed. Köln: Deutscher Ärzte-Verlag; 1995. p.  
465 97-108.
- 466 57. Watkins C, Timm A, Gooberman-Hill R, Harvey I, Haines A, Donovan J. Factors  
467 affecting feasibility and acceptability of a practice-based educational intervention to support  
468 evidence-based prescribing: a qualitative study. Fam Pract. 2004;21(6):661-9.
- 469 58. Dogherty EJ, Harrison MB, Graham ID. Facilitation as a Role and Process in  
470 Achieving Evidence-Based Practice in Nursing: A Focused Review of Concept and Meaning.  
471 Worldviews on Evidence-Based Nursing. 2010;7(2):76-89.



## Quality circles for quality improvement in primary health care

- 472 59. Baskerville NB, Liddy C, Hogg W. Systematic Review and Meta-Analysis of Practice  
473 Facilitation Within Primary Care Settings. *The Annals of Family Medicine*. 2012;10(1):63-  
474 74.
- 475 60. MacVicar R, Guthrie V, O'Rourke J, Sneddon A. Supporting educational supervisor  
476 development at the interface: evaluation of a pilot of PBSGL for faculty development.  
477 *Education for Primary Care*. 2013;24(3):178-84.
- 478 61. Nielsen HG, Davidsen AS. Witnesses in the consultation room - Experiences of peer  
479 group supervision. *Education for Primary Care*. 2017;28(5):258-64.
- 480 62. Davis DA, Thomson MA, Oxman AD, Haynes RB. Changing physician performance.  
481 A systematic review of the effect of continuing medical education strategies. *JAMA*.  
482 1995;274(9):700-5.
- 483 63. Oxman AD, Thomson MA, Davis DA, Haynes RB. No magic bullets: a systematic  
484 review of 102 trials of interventions to improve professional practice. *CMAJ*.  
485 1995;153(10):1423-31.
- 486 64. Gerlach FM, Bahrs O, Weiss-Plumeyer M. [Quality circles in family practice--roots,  
487 concepts, perspectives]. *Fortschr Med*. 1994;112(8):56-61.
- 488 65. Wakefield J, Herbert CP, Maclure M, Dormuth C, Wright JM, Legare J, et al.  
489 Commitment to change statements can predict actual change in practice. *J Contin Educ Health*  
490 *Prof*. 2003;23(2):81-93.
- 491 66. Anwar H, Batty H. Continuing Medical Education Strategy for Primary Health Care  
492 Physicians in Oman: Lessons to be learnt. *Oman Medical Journal*. 2007;22(3):33-5.
- 493 67. Niquille A, Ruggli M, Buchmann M, Jordan D, Bugnon O. The nine-year sustained  
494 cost-containment impact of Swiss pilot physicians-pharmacists quality circles. *Annals of*  
495 *Pharmacotherapy*. 2008;44 (4):650-7.
- 496 68. Andres E, Ludt S, Mainz A, Peters-Klimm F. 20 years of quality circles for family  
497 practitioners - Stocktaking and perspectives: A workshop report. [German]. *Zeitschrift fur*  
498 *Allgemeinmedizin*. 2015;91(2):66-70.
- 499 69. Davis MM, Keller S, DeVoe JE, Cohen DJ. Characteristics and lessons learned from  
500 practice-based research networks (PBRNs) in the United States. *Journal of Healthcare*  
501 *Leadership*. 2012;4:107-16.
- 502 70. Egan M, Bambra C, Thomas S, Petticrew M, Whitehead M, Thomson H. The  
503 psychosocial and health effects of workplace reorganisation. 1. A systematic review of  
504 organisational-level interventions that aim to increase employee control. *Journal of*  
505 *Epidemiology and Community Health*. 2007;61(11):945-54.
- 506 71. Hartmann P, Grusser M, Jorgens V. Structured public health quality circle on the topic  
507 of diabetes management in general practice. [German] *Strukturierte kassenarztliche*  
508 *Qualitätszirkel zum Thema Diabetikerbetreuung in der Praxis*. *Zeitschrift fur arztliche*  
509 *Fortbildung*. 1995;89(4):415-8.
- 510 72. Ioannidis G, Papaioannou A, Thabane L, Gafni A, Hodsman A, Kvern B, et al. The  
511 utilization of appropriate osteoporosis medications improves following a multifaceted  
512 educational intervention: the Canadian quality circle project (CQC). *BMC Medical Education*.  
513 2009;9:54.
- 514 73. Elward K, Blackburn B, Peterson LE, Greenawald M, Hagen MD. Improving quality  
515 of care and guideline adherence for asthma through a group self-assessment module. *Journal*  
516 *of the American Board of Family Medicine*. 2014;27(3):391-8.
- 517 74. Goldberg HI, Wagner EH, Fihn SD, Martin DP, Horowitz CR, Christensen DB, et al.  
518 A randomized controlled trial of CQI teams and academic detailing: can they alter compliance  
519 with guidelines? *Joint Commission Journal on Quality Improvement*. 1998;24(3):130-42.

## Quality circles for quality improvement in primary health care

- 520 75. Lagerlov P, Loeb M, Andrew M, Hjortdahl P. Improving doctors' prescribing  
521 behaviour through reflection on guidelines and prescription feedback: a randomised  
522 controlled study. *Qual Health Care*. 2000;9(3):159-65.
- 523 76. Schneider A, Wensing M, Biessecker K, Quinzler R, Kaufmann-Kolle P, Szecsenyi J.  
524 Impact of quality circles for improvement of asthma care: results of a randomized controlled  
525 trial. *J Eval Clin Pract*. 2008;14(2):185-90.
- 526 77. Jager C, Freund T, Steinhauser J, Stock C, Krisam J, Kaufmann-Kolle P, et al. Impact  
527 of a tailored program on the implementation of evidence-based recommendations for  
528 multimorbid patients with polypharmacy in primary care practices-results of a cluster-  
529 randomized controlled trial. *Implementation Science*. 2017;12(1):8.
- 530 78. Dyrkorn R, Gjelstad S, Espnes KA, Lindbaek M. Peer academic detailing on use of  
531 antibiotics in acute respiratory tract infections. A controlled study in an urban Norwegian out-  
532 of-hours service. *Scandinavian Journal of Primary Health Care*. 2016;34(2):180-5.
- 533 79. Welschen I, Kuyvenhoven MM, Hoes AW, Verheij TJ. Effectiveness of a multiple  
534 intervention to reduce antibiotic prescribing for respiratory tract symptoms in primary care:  
535 randomised controlled trial. *BMJ*. 2004;329(7463):431.
- 536 80. Gjelstad S, Hoyer S, Straand J, Brekke M, Dalen I, Lindbaek M. Improving antibiotic  
537 prescribing in acute respiratory tract infections: cluster randomised trial from Norwegian  
538 general practice (prescription peer academic detailing (Rx-PAD) study). *BMJ*.  
539 2013;347:f4403.
- 540 81. Vervloet M, Meulepas MA, Cals JW, Eimers M, van der Hoek LS, van Dijk L.  
541 Reducing antibiotic prescriptions for respiratory tract infections in family practice: results of a  
542 cluster randomized controlled trial evaluating a multifaceted peer-group-based intervention.  
543 *NPJ Primary Care Respiratory Medicine*. 2016;26:15083.
- 544 82. Rognstad S, Brekke M, Fetveit A, Dalen I, Straand J. Prescription peer academic  
545 detailing to reduce inappropriate prescribing for older patients: a cluster randomised  
546 controlled trial. *Br J Gen Pract*. 2013;63(613):e554-62.
- 547 83. Richards D, Toop L, Graham P. Do clinical practice education groups result in  
548 sustained change in GP prescribing? *Family Practice*. 2003;20(2):199-206.
- 549 84. Wensing M, Broge B, Kaufmann-Kolle P, Andres E, Szecsenyi J. Quality circles to  
550 improve prescribing patterns in primary medical care: what is their actual impact? *J Eval Clin*  
551 *Pract*. 2004;10(3):457-66.
- 552 85. Wensing M, Broge B, Riens B, Kaufmann-Kolle P, Akkermans R, Grol R, et al.  
553 Quality circles to improve prescribing of primary care physicians. Three comparative studies.  
554 *Pharmacoepidemiology and drug safety*. 2009;18(9):763-9.
- 555 86. Niquille A, Ruggli M, Buchmann M, Jordan D, Bugnon O. The nine-year sustained  
556 cost-containment impact of swiss pilot physicians-pharmacists quality circles. *Ann*  
557 *Pharmacother*. 2010;44(4):650-7.
- 558 87. Verstappen WH, van der Weijden T, Sijbrandij J, Smeele I, Hermsen J, Grimshaw J,  
559 et al. Effect of a practice-based strategy on test ordering performance of primary care  
560 physicians: a randomized trial. *JAMA*. 2003;289(18):2407-12.
- 561 88. Verstappen WH, van der Weijden T, Dubois WI, Smeele I, Hermsen J, Tan FE, et al.  
562 Improving test ordering in primary care: the added value of a small-group quality  
563 improvement strategy compared with classic feedback only. *Ann Fam Med*. 2004;2(6):569-  
564 75.
- 565 89. Verstappen WH, van Merode F, Grimshaw J, Dubois WI, Grol RP, van der Weijden  
566 T. Comparing cost effects of two quality strategies to improve test ordering in primary care: a  
567 randomized trial. *Int J Qual Health Care*. 2004;16(5):391-8.

## Quality circles for quality improvement in primary health care

- 568 90. Verbakel NJ, Langelaan M, Verheij TJM, Wagner C, Zwart DLM. Effects of patient  
569 safety culture interventions on incident reporting in general practice: A cluster randomised  
570 trial a cluster randomised trial. *British Journal of General Practice*. 2015;65(634):e319-e29.
- 571 91. Zaher E, Ratnapalan S. Practice-based small group learning programs: systematic  
572 review. *Can Fam Physician*. 2012;58(6):637-42, e310-6.
- 573 92. Woodward CA. Improving provider skills. In: Organization WH, editor. *Strategies for*  
574 *assisting health workers to modify and improve skills: Developing quality health care - a*  
575 *process of change*. Geneva: Evidence and Information for Policy, Department of Organization  
576 of Health Services Delivery, World Health Organization; 2000.
- 577 93. Davis D, O'Brien M, Freemantle N, Wolf FM, Mazmanian P, Taylor-Vaisey A.  
578 Impact of formal continuing medical education: Do conferences, workshops, rounds, and  
579 other traditional continuing education activities change physician behavior or health care  
580 outcomes? *JAMA*. 1999;282(9):867-74.
- 581 94. Davis DA, Mazmanian PE, Fordis M, Van Harrison R, Thorpe KE, Perrier L.  
582 Accuracy of physician self-assessment compared with observed measures of competence: a  
583 systematic review. *JAMA*. 2006;296(9):1094-102.
- 584 95. O'Brien MA, Rogers S, Jamtvedt G, Oxman AD, Odgaard-Jensen J, Kristoffersen DT,  
585 et al. Educational outreach visits: effects on professional practice and health care outcomes.  
586 *Cochrane Database Syst Rev*. 2007(4):Cd000409.
- 587 96. Bowie P, Pope L, Lough M. A review of the current evidence base for significant  
588 event analysis. *Journal of Evaluation in Clinical Practice*. 2008;14(4):520-36.
- 589 97. O'Brien MA, Freemantle N, Oxman AD, Wolf F, Davis DA, Herrin J. Continuing  
590 education meetings and workshops: effects on professional practice and health care outcomes.  
591 *Cochrane Database Syst Rev*. 2001(2):CD003030.
- 592 98. Forsetlund L, Bjorndal A, Rashidian A, Jamtvedt G, O'Brien MA, Wolf F, et al.  
593 Continuing education meetings and workshops: effects on professional practice and health  
594 care outcomes. *Cochrane Database Syst Rev*. 2009(2):Cd003030.
- 595 99. Harris J. KK, Henegan C. ME, N. R, R. P. Are journal clubs effective in supporting  
596 evidence-based decision making? A systematic review. *BEME Guide No. 16. Medical*  
597 *Teacher*. 2011;33(1):9-23.
- 598 100. Flodgren G, Parmelli E, Doumit G, Gattellari M, O'Brien MA, Grimshaw J, et al.  
599 Local opinion leaders: effects on professional practice and health care outcomes. *Cochrane*  
600 *Database Syst Rev*. 2011(8):Cd000125.
- 601 101. Giguere A, Legare F, Grimshaw J, Turcotte S, Fiander M, Grudniewicz A, et al.  
602 Printed educational materials: effects on professional practice and healthcare outcomes.  
603 *Cochrane Database Syst Rev*. 2012;10:CD004398.
- 604 102. Farmer AP, Legare F, Turcot L, Grimshaw J, Harvey E, McGowan JL, et al. Printed  
605 educational materials: effects on professional practice and health care outcomes. *Cochrane*  
606 *Database Syst Rev*. 2008(3):Cd004398.
- 607 103. Grimshaw JM, Schunemann HJ, Burgers J, Cruz AA, Heffner J, Metersky M, et al.  
608 Disseminating and implementing guidelines: article 13 in Integrating and coordinating efforts  
609 in COPD guideline development. An official ATS/ERS workshop report. *Proceedings of the*  
610 *American Thoracic Society*. 2012;9(5):298-303.
- 611 104. Baker R, Camosso-Stefinovic J, Gillies C, Shaw EJ, Cheater F, Flottorp S, et al.  
612 Tailored interventions to overcome identified barriers to change: effects on professional  
613 practice and health care outcomes. *Cochrane Database Syst Rev*. 2010(3):Cd005470.
- 614 105. Baker R, Camosso-Stefinovic J, Gillies C, Shaw EJ, Cheater F, Flottorp S, et al.  
615 Tailored interventions to address determinants of practice. *Cochrane Database Syst Rev*.  
616 2015(4):Cd005470.

## Quality circles for quality improvement in primary health care

- 617 106. Parmelli E, Flodgren G, Schaafsma ME, Baillie N, Beyer FR, Eccles MP. The  
618 effectiveness of strategies to change organisational culture to improve healthcare  
619 performance. *Cochrane Database Syst Rev.* 2011(1):Cd008315.
- 620 107. Gill PS, Makela M, Vermeulen KM, Freemantle N, Ryan G, Bond C, et al. Changing  
621 doctor prescribing behaviour. *Pharmacy world & science : PWS.* 1999;21(4):158-67.
- 622 108. Arnold SR, Straus SE. Interventions to improve antibiotic prescribing practices in  
623 ambulatory care. *Cochrane Database Syst Rev.* 2005(4):Cd003539.
- 624 109. Roberts CM, Stone RA, Buckingham RJ, Pursey NA, Lowe D, Potter JM. A  
625 randomized trial of peer review: the UK National Chronic Obstructive Pulmonary Disease  
626 Resources and Outcomes Project: three-year evaluation. *J Eval Clin Pract.* 2012;18(3):599-  
627 605.
- 628 110. Ivers N, Jamtvedt G, Flottorp S, Young JM, Odgaard-Jensen J, French SD, et al. Audit  
629 and feedback: effects on professional practice and healthcare outcomes. *Cochrane Database*  
630 *Syst Rev.* 2012(6):Cd000259.
- 631 111. Cadogan SL, Browne JP, Bradley CP, Cahill MR. The effectiveness of interventions  
632 to improve laboratory requesting patterns among primary care physicians: a systematic  
633 review. *Implement Sci.* 2015;10:167.
- 634 112. Nambiar RM. Professional development--in a changing world. *Singapore medical*  
635 *journal.* 2004;45(12):551-7.
- 636 113. Davis D. Continuing education, guideline implementation, and the emerging  
637 transdisciplinary field of knowledge translation. *J Contin Educ Health Prof.* 2006;26(1):5-12.
- 638 114. Czabanowska K, Klemenc-Ketis Z, Potter A, Rochfort A, Tomasik T, Csiszar J, et al.  
639 Development of a competency framework for quality improvement in family medicine: a  
640 qualitative study. *J Contin Educ Health Prof.* 2012;32(3):174-80.
- 641 115. Quasdorf I. Experience exchange in quality circles: No routine approach without  
642 recognized training. [German] Erfahrungsaustausch in qualitätszirkeln: Kein stammtisch,  
643 sondern anerkannte fortbildung. *Deutsches Arzteblatt.* 2008;105(5):A206-A9.
- 644 116. Renschler HE. Methods in continuing professional education. Results of a pilot survey  
645 of physicians. [German] Methoden fur professionelles Weiterlernen. Ergebnis orientierender  
646 Umfragen bei Arzten. *Schweizerische Rundschau fur Medizin Praxis = Revue suisse de*  
647 *medecine Praxis.* 1992;81(52):1574-85.
- 648 117. Renschler HE. Systematic aspects of problem-based, case-related, practice-oriented,  
649 professional continuing education. [German] Systematik des problemorientierten,  
650 fallbezogenen, praxisgebundenen, professionellen Weiterlernens. *Zeitschrift fur arztliche*  
651 *Fortbildung.* 1995;89(4):392-6.
- 652 118. Ogrinc G, Mooney SE, Estrada C, Foster T, Goldmann D, Hall LW, et al. The  
653 SQUIRE (Standards for Quality Improvement Reporting Excellence) guidelines for quality  
654 improvement reporting: explanation and elaboration. *Qual Saf Health Care.*  
655 2008;17(Suppl\_1):i13-32.
- 656 119. Glasziou P, Ogrinc G, Goodman S. Can evidence-based medicine and clinical quality  
657 improvement learn from each other? *BMJ Qual Saf.* 2011;20 Suppl 1:i13-7.
- 658 120. Vollmar HC, Rieger MA, Butzlaff ME, Ostermann T. General Practitioners'  
659 preferences and use of educational media: a German perspective. *BMC Health Serv Res.*  
660 2009;9:31.
- 661 121. Overton GK, Kelly D, McCalister P, Jones J, MacVicar R. The practice-based small  
662 group learning approach: making evidence-based practice come alive for learners. *Nurse*  
663 *Education Today.* 2009;29(6):671-5.
- 664 122. Sommers LS, Morgan L, Johnson L, Yatabe K. Practice inquiry: clinical uncertainty  
665 as a focus for small-group learning and practice improvement. *J Gen Intern Med.*  
666 2007;22(2):246-52.

## Quality circles for quality improvement in primary health care

- 667 123. Overton GK, McCalister P, Kelly D, Macvicar R. Practice-based small group learning:  
668 how health professionals view their intention to change and the process of implementing  
669 change in practice. *Med Teach*. 2009;31(11):e514-20.
- 670 124. Frich J, Høye S, Lindbaek M, Straand J. General practitioners and tutors' experiences  
671 with peer group academic detailing: a qualitative study. *BMC Family Practice*. 2010;11(1):12.
- 672 125. Gehring K, Schwappach DLB, Battaglia M, Buff R, Huber F, Sauter P, et al. Safety  
673 climate and its association with office type and team involvement in primary care.  
674 *International Journal for Quality in Health Care*. 2013;25(4):394-402.
- 675 126. Henriksen K, Hansen EH. The threatened self: general practitioners' self-perception in  
676 relation to prescribing medicine. *Soc Sci Med*. 2004;59(1):47-55.
- 677 127. Gehring SC, Kandzora J, Jeske-Saathoff E, Laag S, Hofmann W, Steinhauser J.  
678 Structured pharmacotherapy in multimorbid seniors - A pilot project. [German]. *Zeitschrift  
679 für Allgemeinmedizin*. 2017;93(6):266-70.
- 680 128. Brondt A, Sokolowski I, Olesen F, Vedsted P. Continuing medical education and  
681 burnout among Danish GPs. *British Journal of General Practice*. 2008;58(546):15-9.
- 682 129. Kjaer NK, Steenstrup AP, Pedersen LB, Halling A. Continuous professional  
683 development for GPs: experience from Denmark. *Postgraduate medical journal*.  
684 2014;90(1065):383-7.
- 685 130. Peterson U, Bergstrom G, Samuelsson M, Asberg M, Nygren A. Reflecting peer-  
686 support groups in the prevention of stress and burnout: randomized controlled trial. *Journal of  
687 advanced nursing*. 2008;63(5):506-16.
- 688 131. Onglatco MU, Matsui T. The Anatomy of Japanese Quality Circles 1991 [Les cercles  
689 de Qualité]. Available from: <http://civilisations.revues.org/index1666.html>.
- 690 132. Best M, Neuhauser D. Walter A Shewhart, 1924, and the Hawthorne factory. *Qual Saf  
691 Health Care*. 2006;15(2):142-3.
- 692 133. Deming WE. Deming's 1950 Lecture to Japanese Management 1950 [Origin of PDSA  
693 Cycle]. Available from: [http://hclecures.blogspot.com/1970/08/demings-1950-lecture-to-  
694 japanese.html](http://hclecures.blogspot.com/1970/08/demings-1950-lecture-to-japanese.html).
- 695 134. Donabedian A. 20 years of research on the quality of medical care, 1964-1984. *Salud  
696 Publica Mex*. 1988;30(2):202-15.
- 697 135. Wynia MK. Performance measures for ethics quality. *Eff Clin Pract*. 1999;2(6):294-8.
- 698 136. Schmele JA, Allen ME, Butler S, Gresham D. Quality Circles in the Public Health  
699 Sector: Implementation and Effect. *Public Health Nursing*. 1991;8(3):190-5.
- 700 137. Wood DF. Problem based learning. *BMJ*. 2003;326(7384):328-30.
- 701 138. Premi JN. Continuing medical education in family medicine: a report of eight years'  
702 experience. *Can Med Assoc J*. 1974;111(11):1232-3.
- 703 139. Grol R, Baker R, Wensing M, Jacobs A. Quality Assurance in General Practice: the  
704 State of the Art in Europe. *Family Practice*. 1994;11(4):460-7.
- 705 140. Newton J, Hutchinson A, Steen N, Russell I, Haines E. Educational potential of  
706 medical audit: observations from a study of small groups setting standards. *Quality in health  
707 care : QHC*. 1992;1(4):256-9.
- 708 141. Walsh AE, Armson H, Wakefield JG, Leadbetter W, Roder S. Using a novel small-  
709 group approach to enhance feedback skills for community-based teachers. *Teaching and  
710 learning in medicine*. 2009;21(1):45-51.
- 711 142. Thesen J. Kvalitetsverktøp prosjektet 2010 [Quality improvement project 2010] Oslo:  
712 NFA; 2010 [updated 10/01/2010. Available from:  
713 <http://legeforeningen.no/PageFiles/55104/120213%20Kvalitetsverkt%C3%B8yprosjektet.pdf>.
- 714 143. Goldberg HI, Rund DA, Hopkins JR. The Midpeninsula Health Service: action  
715 research using small primary care groups to provide evidence-based medicine that empowers

## Quality circles for quality improvement in primary health care

- 716 patients while continuously improving quality and lowering costs. *Medical care*. 2002;40(4  
717 Suppl):II32-9.
- 718 144. Parker LE, de Pillis E, Altschuler A, Rubenstein LV, Meredith LS. Balancing  
719 participation and expertise: a comparison of locally and centrally managed health care quality  
720 improvement within primary care practices. *Qualitative Health Research*. 2007;17(9):1268-  
721 79.
- 722 145. Williamson M, Cardona-Morrell M, Elliott JD, Reeve JF, Stocks NP, Emery J, et al.  
723 Prescribing Data in General Practice Demonstration (PDGPD) project--a cluster randomised  
724 controlled trial of a quality improvement intervention to achieve better prescribing for chronic  
725 heart failure and hypertension. *BMC Health Services Research*. 2012;12:273.
- 726 146. Griem C, Kleudgen S, Diel F. Qualitätssicherung: Instrumente der kollegialen  
727 Qualitätsförderung [Quality assurance: tool for collaborative quality improvement]. *Dtsch*  
728 *Arztebl International*. 2013;110(26):1310-3.
- 729 147. McKnight A, Mills K. Continuing medical education for general practitioners--a  
730 Northern Ireland plan. *Ulster Med J*. 1992;61(2):157-62.
- 731 148. Walshe K. Understanding what works--and why--in quality improvement: the need for  
732 theory-driven evaluation. *Int J Qual Health Care*. 2007;19(2):57-9.
- 733 149. Ovretveit J, Gustafson D. Using research to inform quality programmes. *BMJ*.  
734 2003;326(7392):759-61.
- 735 150. Rohrbasser A, Mickan S, Harris J. Exploring why quality circles work in primary  
736 health care: a realist review protocol. *Systematic Reviews*. 2013;2(1):110.  
737

## 738 **Supporting information**

- 739 Supplementary file S1: search strings
- 740 Supplementary file S2: text books
- 741 Supplementary file S3: background papers
- 742 Supplementary file S4: key papers on quality circles
- 743

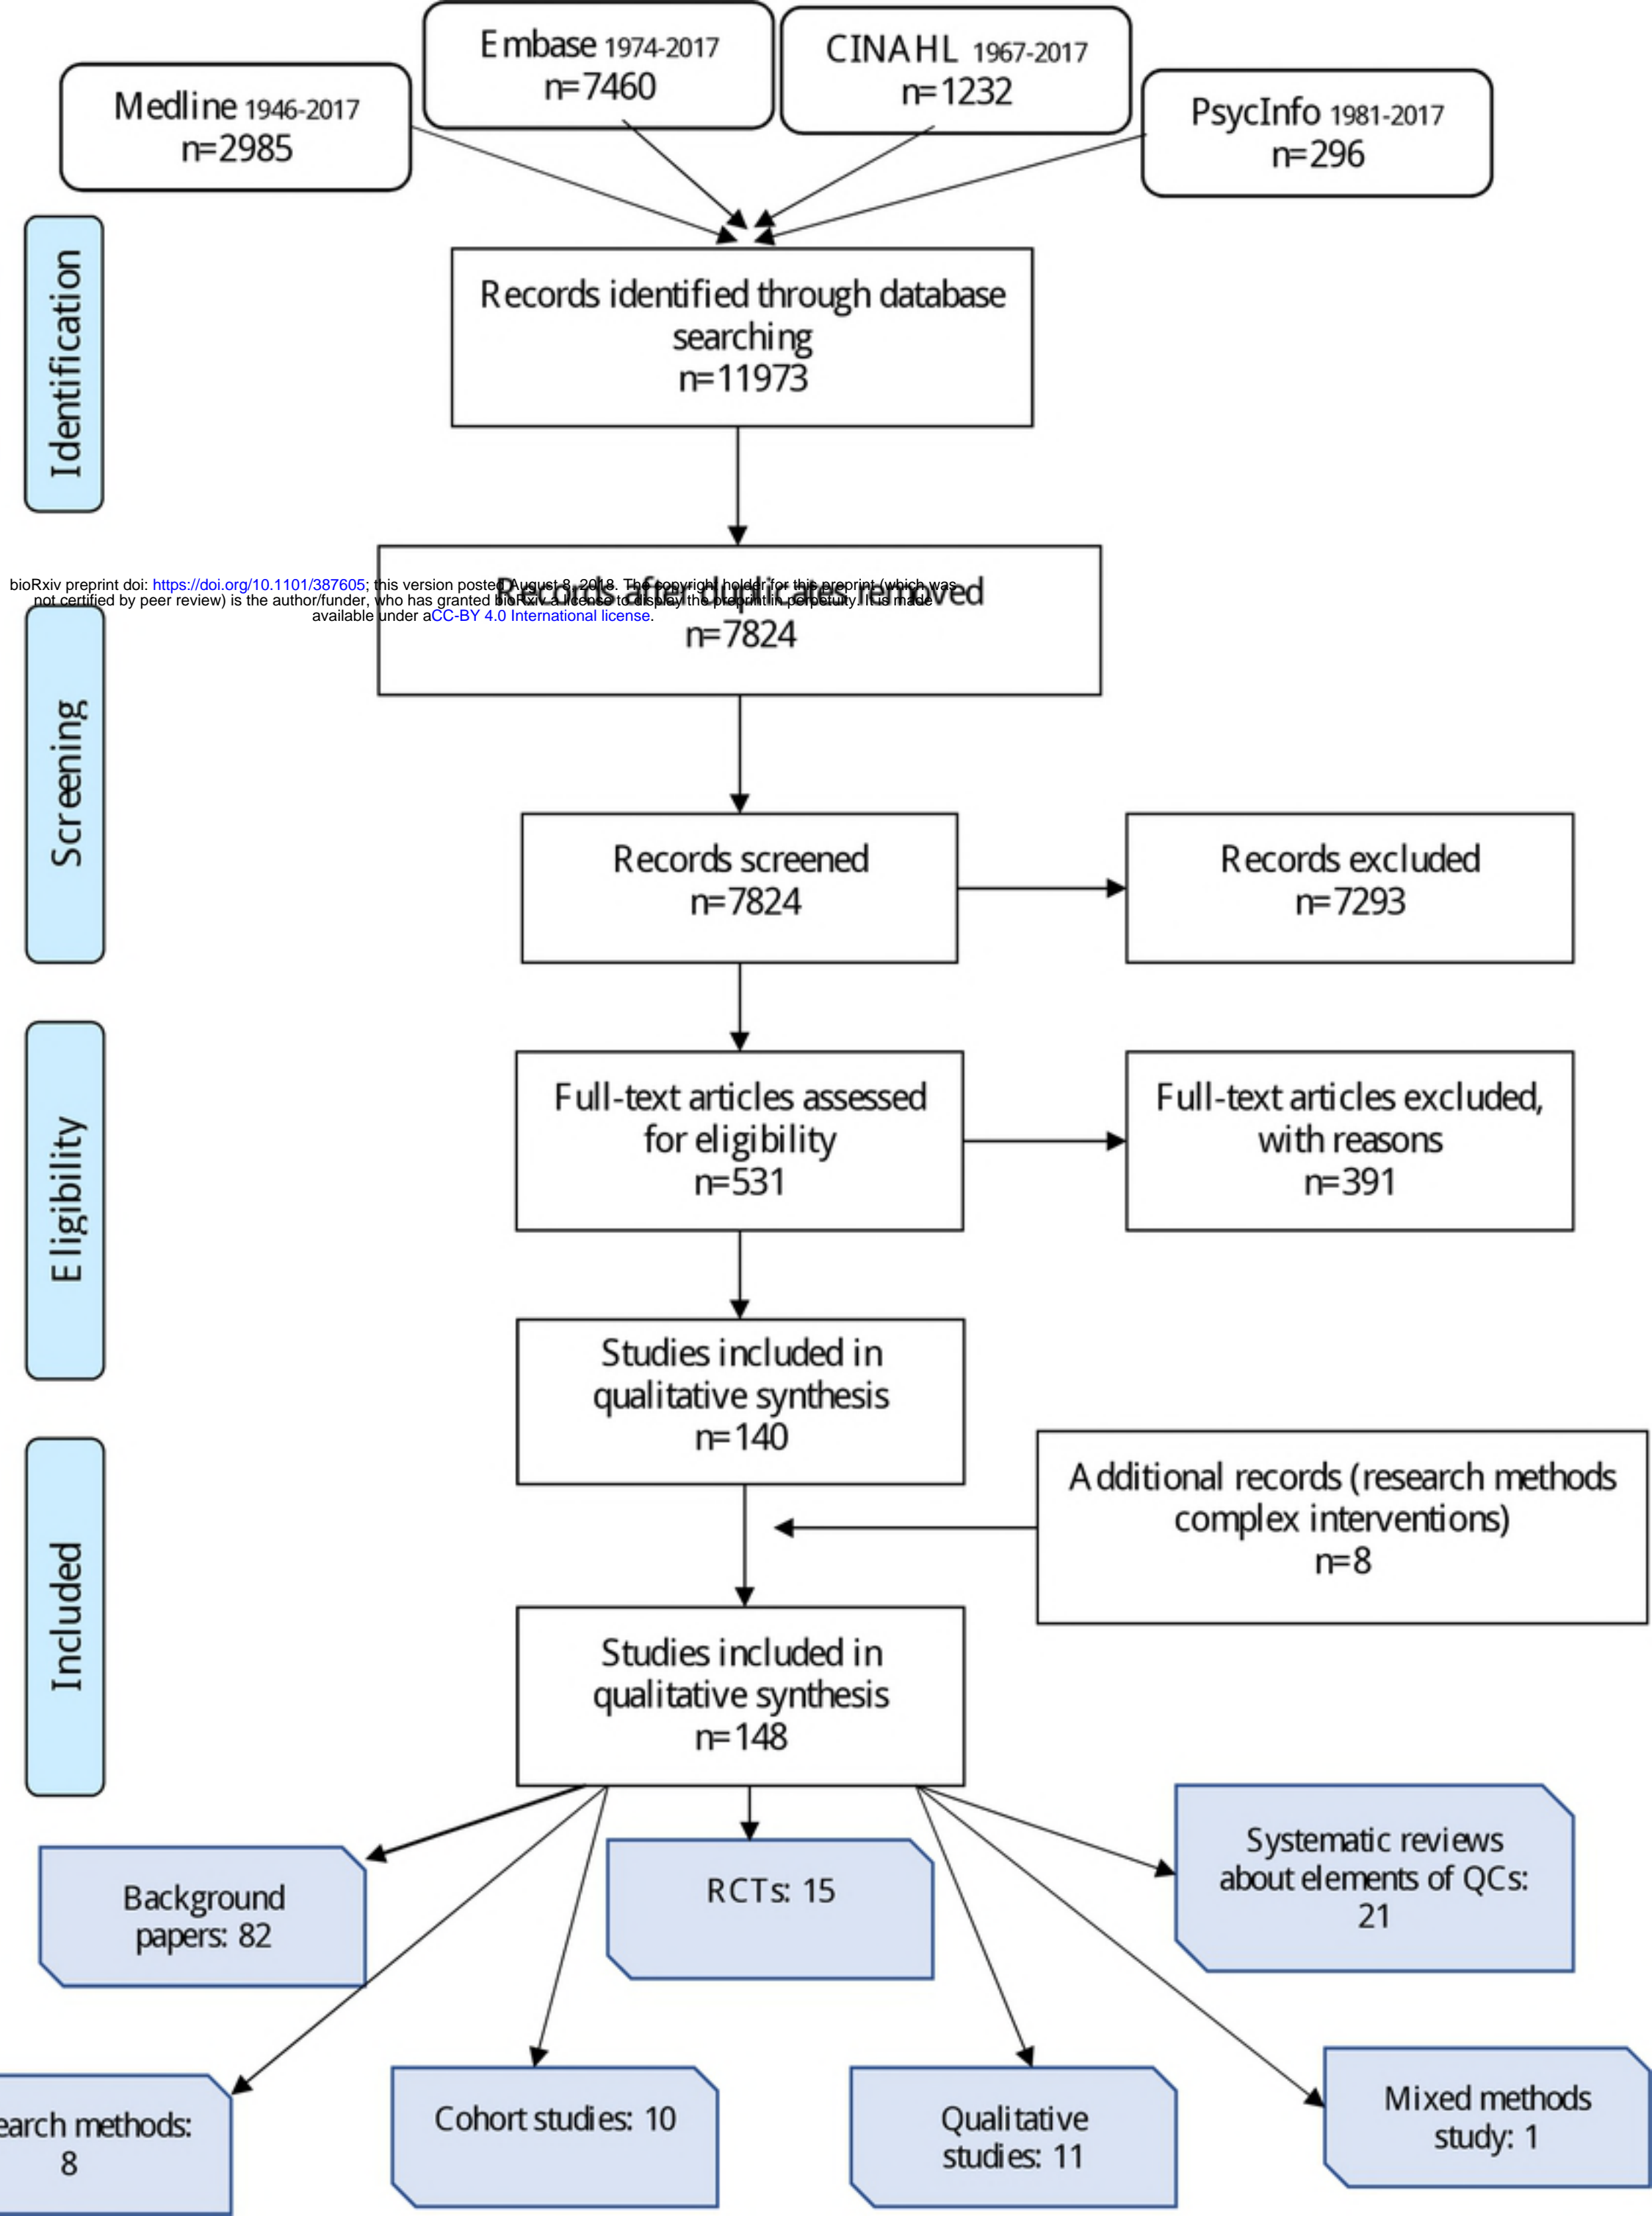

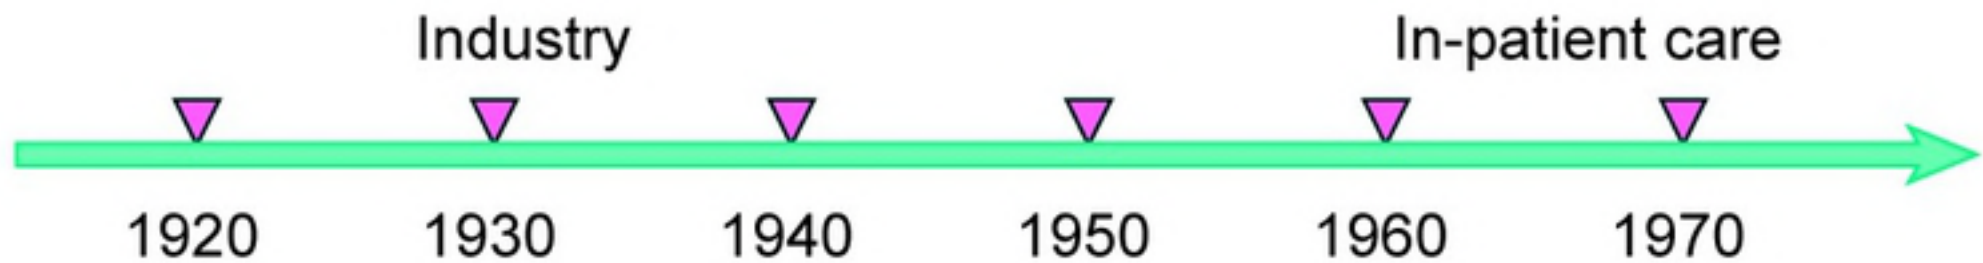

Shewart cycle

PDCA cycle

PDSA cycle

Linear

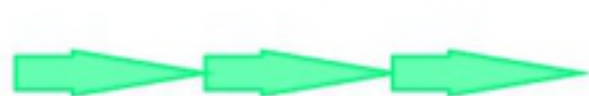

Specification  
Production  
Inspection

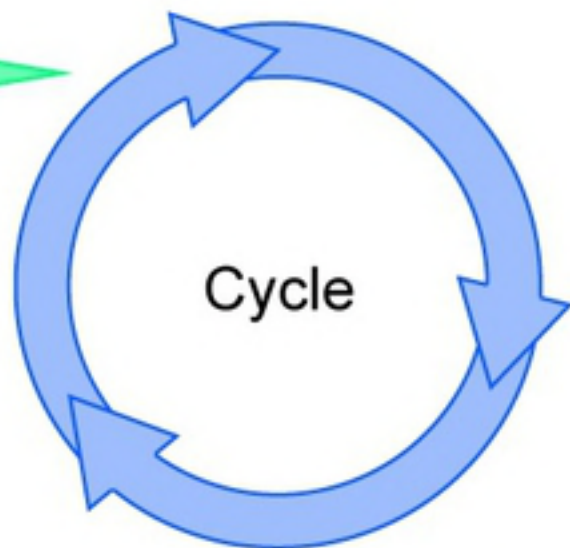

Specification  
Production  
Inspection

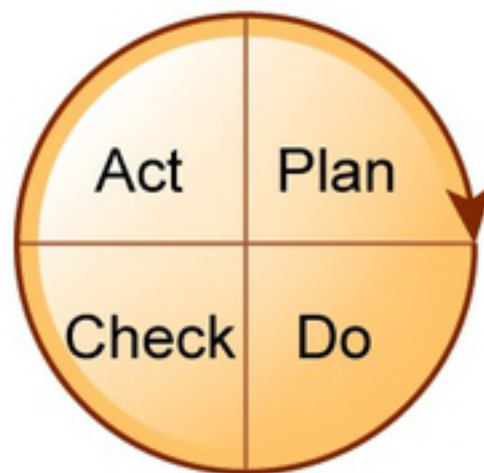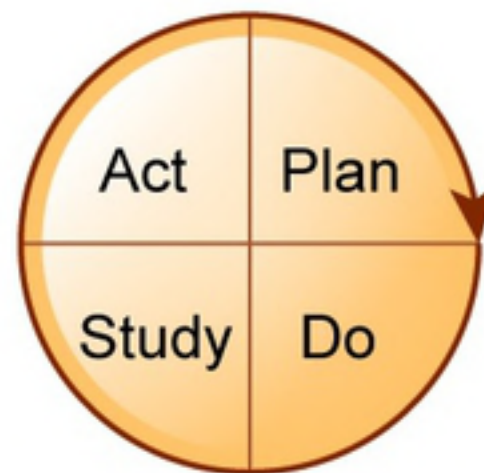



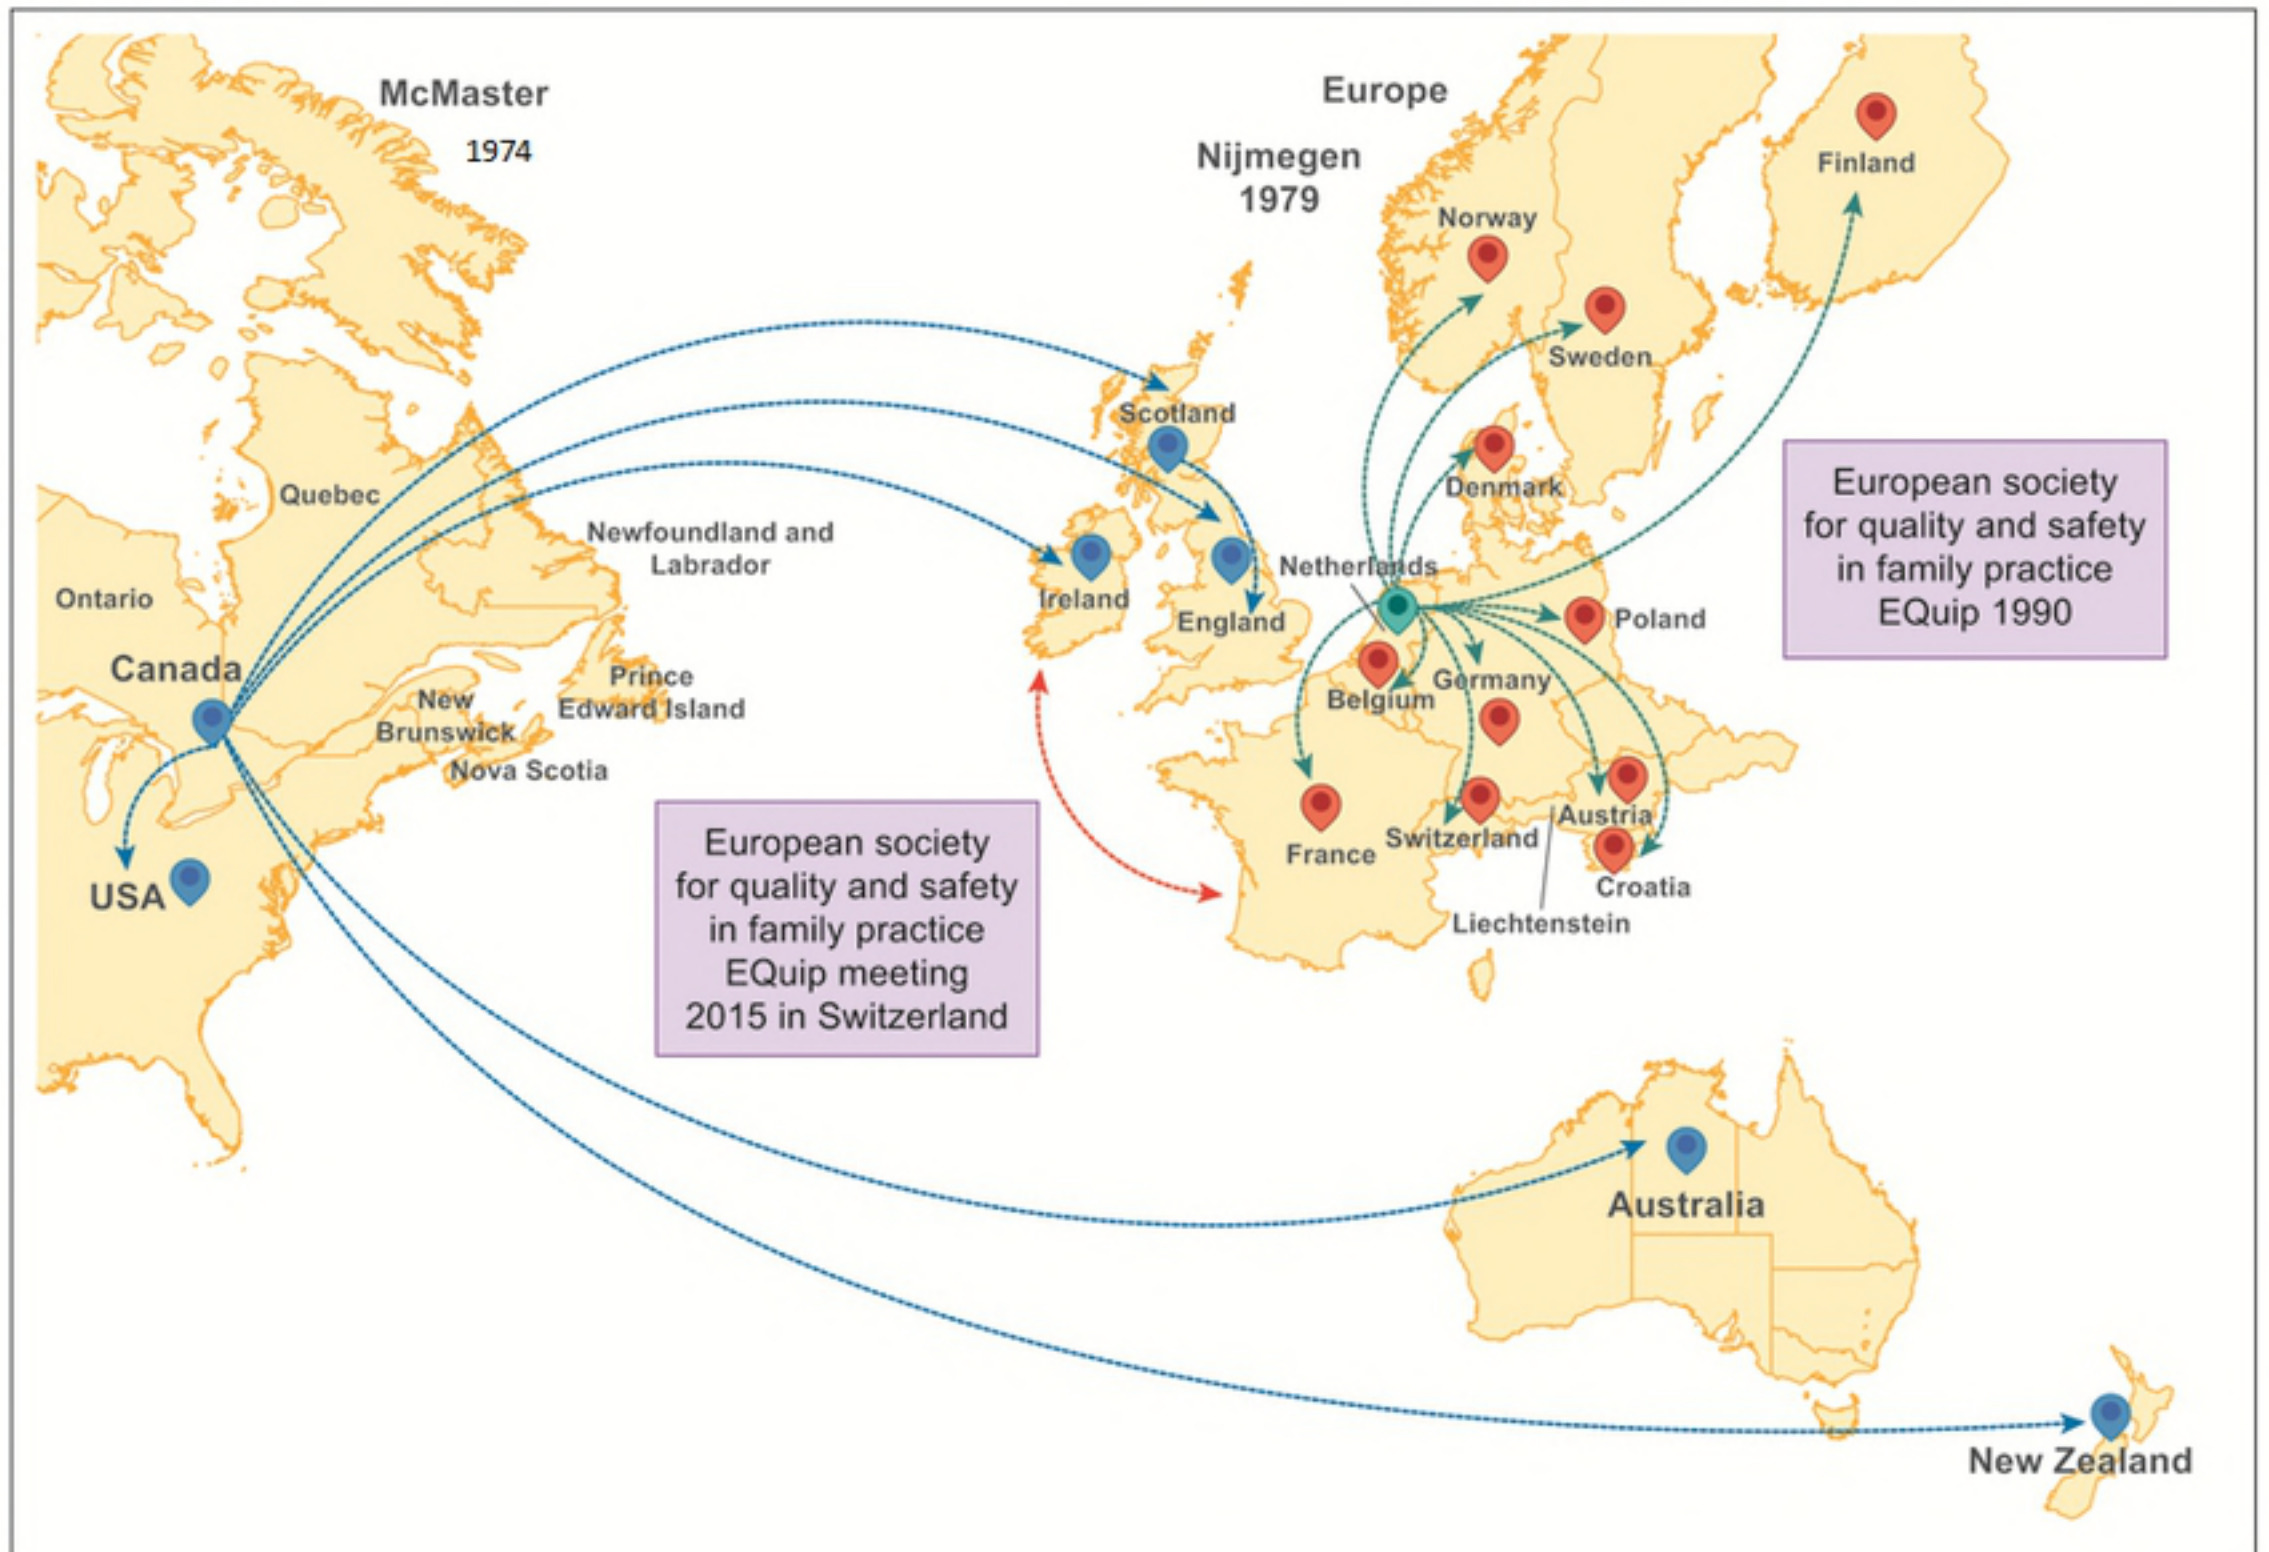

Source: https://www.biorxiv.org/content/10.1101/387605v1.full.pdf
